# Supplementary material for: Mussel-inspired polydopamine modification of supports for the facile synthesis of zeolite LTA molecular sieve membranes
Source: Royal Society of Chemistry journal article supplement (doi:10.1039/c4ra05400h), 2014-01-01
Supplement: c4ra05400h1.pdf [file c4ra05400h1.pdf]

## Supporting information

# **Mussel-Inspired Polydopamine Modification of Supports for Facile Synthesis of Zeolite LTA Molecular Sieve Membranes**

Chenfang Yuan, Qian Liu, Huifeng Chen, and Aisheng Huang

Institute of New Energy Technology, Ningbo Institute of Material Technology and  
Engineering, CAS, 1219 Zhongguan Road, 315201 Ningbo, P. R. China

**Figure S1**

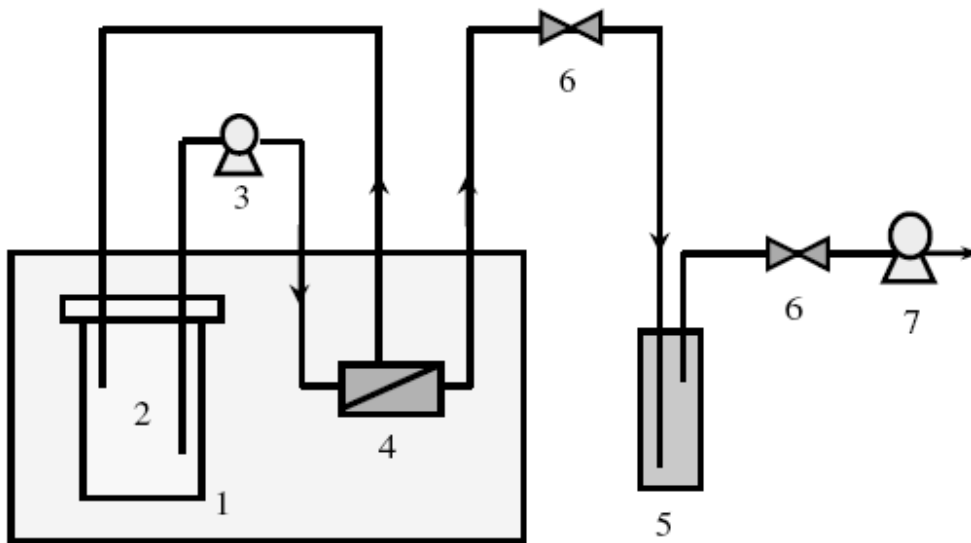

**Figure S1.** Schematic diagram of experimental apparatus for pervaporation. (1) Water bath, (2) liquid tank, (3) circle pump, (4) permeation cell, (5) cold traps, (6) ball valve, (7) vacuum pump.

**Figure S2**

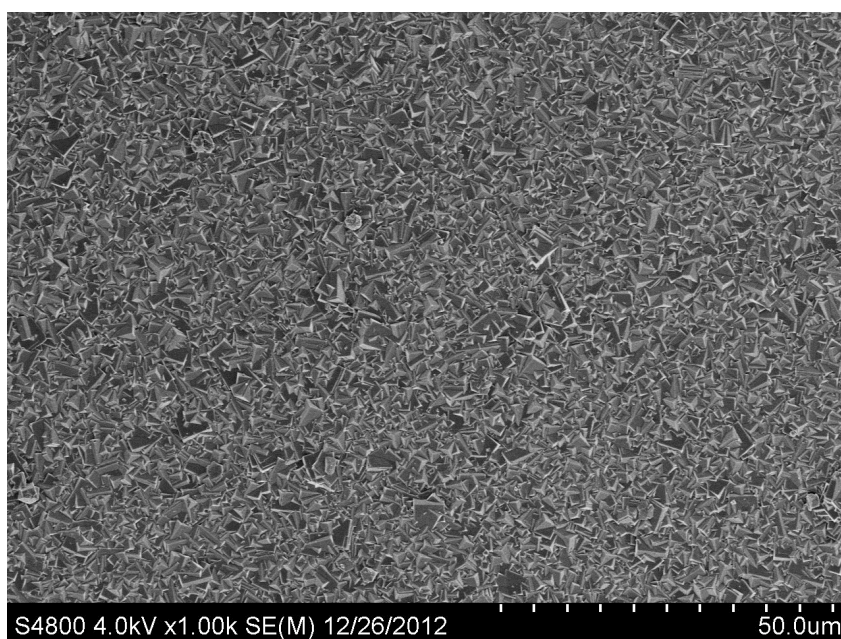

**Figure S2.** Top view FESEM image of the zeolite LTA membrane at low magnification prepared on polydopamine modified  $\text{Al}_2\text{O}_3$  disk.

**Figure S3**

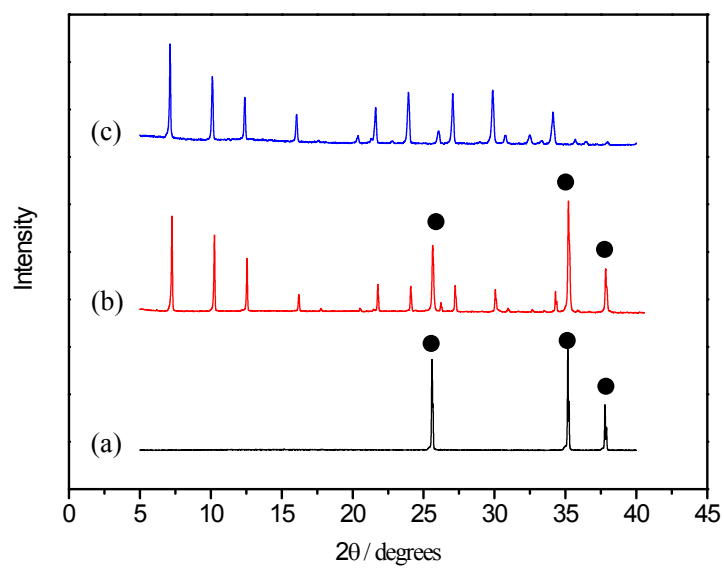

**Figure S3.** XRD patterns of the Al<sub>2</sub>O<sub>3</sub> support (a), zeolite LTA membrane prepared on polydopamine functionalized Al<sub>2</sub>O<sub>3</sub> support (b), and zeolite LTA powder (c). (●): Al<sub>2</sub>O<sub>3</sub> support, (not marked): zeolite LTA.

**Figure S4**

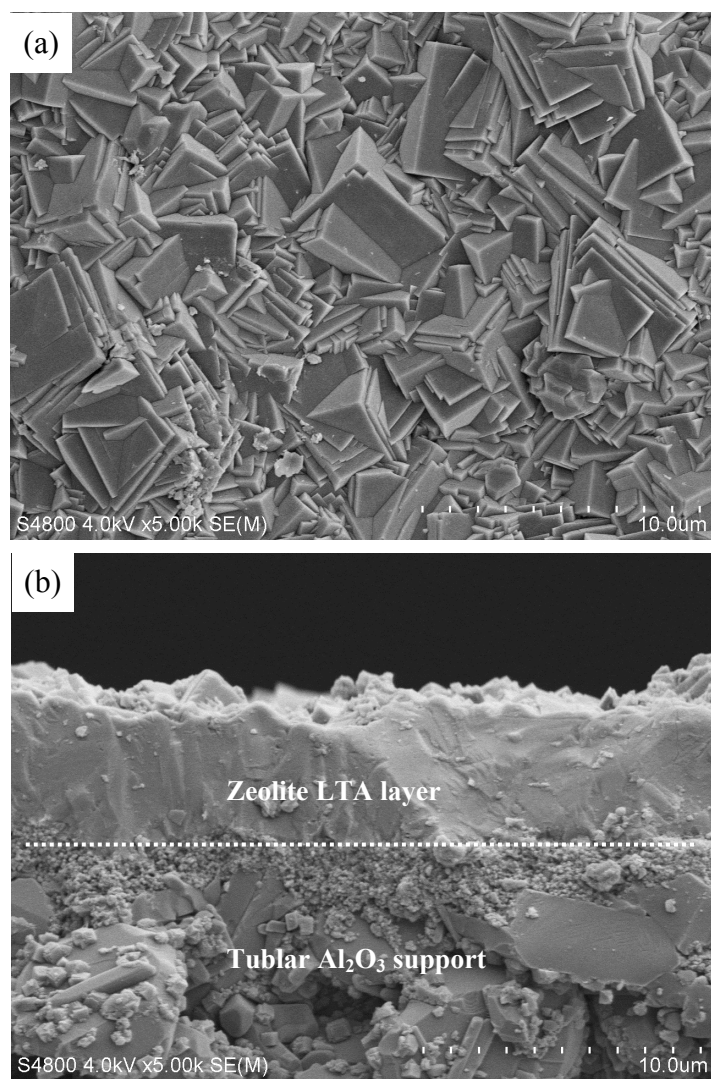

**Figure S4.** Top view (a) and cross-section FESEM images of the zeolite LTA membrane prepared on polydopamine functionalized  $\alpha\text{-Al}_2\text{O}_3$  tubes.

**Figure S5**

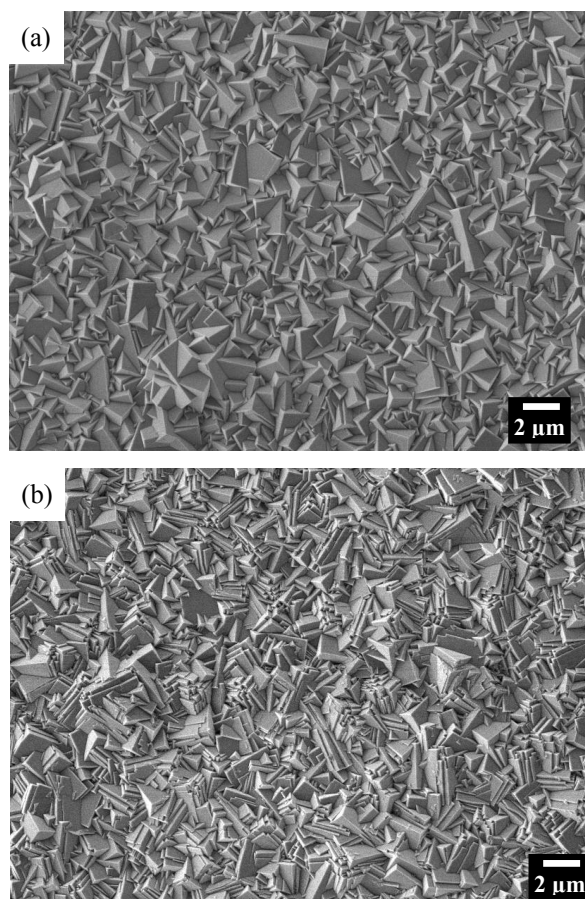

**Figure S5.** Top view FESEM images of the zeolite LTA membrane prepared on PDA-modified glass plate (a) and stainless steel disk (b).

**Figure S6**

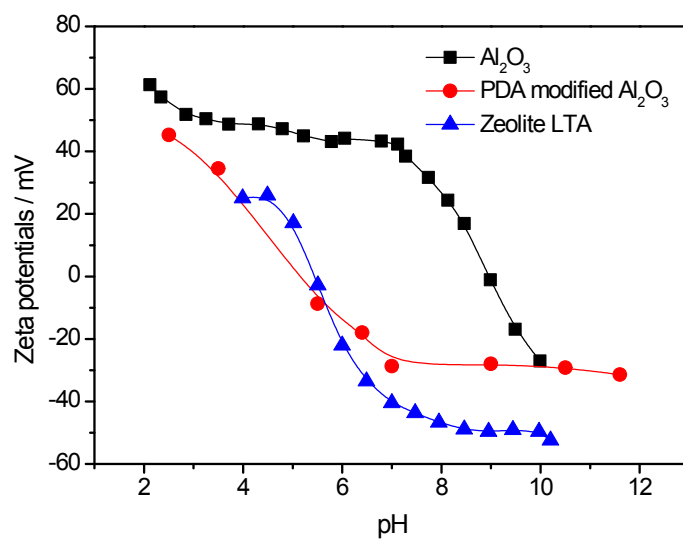

**Figure S6.** Zeta potential of  $\text{Al}_2\text{O}_3$  (A. Huang, et al, *Chem. Mater.* **2010**, 22, 4353), PDA modified  $\text{Al}_2\text{O}_3$  and zeolite LTA particles (A. Huang, et al, *Chem. Mater.* **2010**, 22, 4353) suspended in water as function of pH.

**Figure S7**

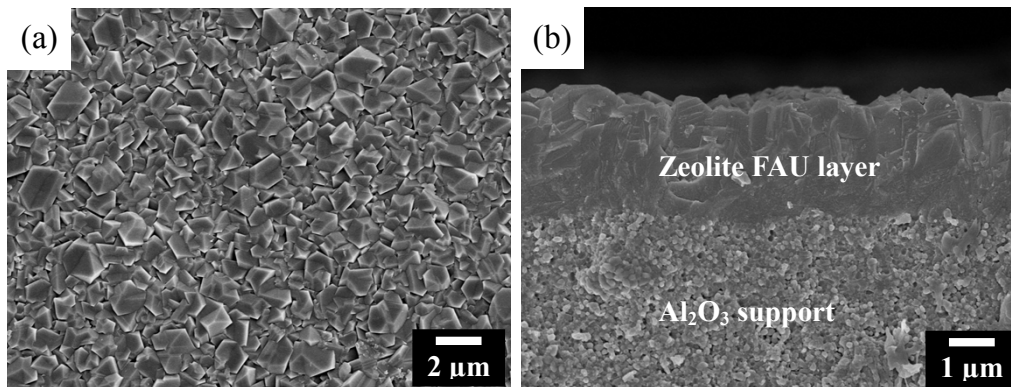

**Fig. S7.** Top view (a) and cross-section (b) FESEM images of the zeolite FAU membrane prepared on PDA-modified Al<sub>2</sub>O<sub>3</sub> disks.

For synthesis of the zeolite FAU membrane on the PDA-modified  $\alpha$ -Al<sub>2</sub>O<sub>3</sub> disk, a clear synthesis solution with the molar ratio of 70Na<sub>2</sub>O : 1Al<sub>2</sub>O<sub>3</sub> : 20SiO<sub>2</sub> : 2000H<sub>2</sub>O, was prepared by mixing aluminate solution and silicate solution at room temperature according to the procedure reported elsewhere [A. Huang, N. Wang and J. Caro, *J. Membr. Sci.* 2012, **389**, 272]. The PDA-modified or non-modified  $\alpha$ -Al<sub>2</sub>O<sub>3</sub> disks were horizontally placed face down in a Teflon-lined stainless steel autoclave, and then the synthesis solution was poured into. After in-situ growth for 24 h at 348 K, the solution was decanted off and the membrane was washed with deionized water several times, and then dried in air at 383 K over night for characterization or permeation measurement.



**Figure S8**

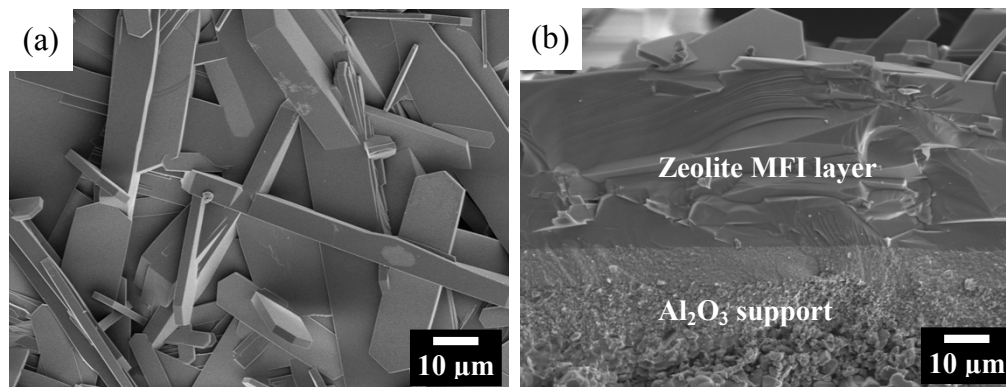

**Fig. S8.** Top view (a) and cross-section (b) FESEM images of the zeolite MFI membrane prepared on PDA-modified Al<sub>2</sub>O<sub>3</sub> disks.

For synthesis of the zeolite MFI membrane on the PDA-modified  $\alpha$ -Al<sub>2</sub>O<sub>3</sub> disk, a clear synthesis solution with the molar ratio of 1TBABr : 2NaOH : 10SiO<sub>2</sub> : 600H<sub>2</sub>O, was prepared by mixing TBABr, NaOH and silicate solution in water at room temperature according to the procedure reported elsewhere with minor modification [H. Chen, C. Song and W. Yang, *Microporous Mesoporous Mater.* 2007, **102**, 249]. The PDA-treated or non-treated  $\alpha$ -Al<sub>2</sub>O<sub>3</sub> disks were horizontally placed face down in a Teflon-lined stainless steel autoclave, and then the synthesis solution was poured into. After in-situ growth for 48 h at 453 K, the solution was decanted off and the membrane was washed with deionized water several times, and then dried in air at 383 K over night for characterization or permeation measurement.

**Table S1**

**Table S1.** Comparisons of the pervaporation properties of the as-synthesized zeolite LTA membrane prepared in this study with literature data.

| Supports                                      | Seeding | Mixtures (A / B)        | Concentration<br>(A wt%) | T (K) | Flux (kg/<br>m <sup>2</sup> h) | $\alpha_{A/B}$ | References |
|-----------------------------------------------|---------|-------------------------|--------------------------|-------|--------------------------------|----------------|------------|
| Mullite tube                                  | Yes     | H <sub>2</sub> O/EtOH   | 10                       | 348   | 2.08                           | 42000          | S1         |
| ZnO <sub>2</sub> tube                         | No      | H <sub>2</sub> O/i-PrOH | 10                       | 343   | 0.5                            | 5000           | S2         |
| $\alpha$ -Al <sub>2</sub> O <sub>3</sub> tube | Yes     | H <sub>2</sub> O/i-PrOH | 5                        | 343   | 1.67                           | 10000          | S3         |
| $\alpha$ -Al <sub>2</sub> O <sub>3</sub> tube | No      | H <sub>2</sub> O/EtOH   | 5                        | 318   | 0.23                           | 8300           | S4         |
| $\alpha$ -Al <sub>2</sub> O <sub>3</sub> tube | No      | H <sub>2</sub> O/i-PrOH | 5                        | 343   | 1.02                           | 9481           | S5         |
| $\alpha$ -Al <sub>2</sub> O <sub>3</sub> tube | No      | H <sub>2</sub> O/i-PrOH | 5                        | 343   | 1.49                           | 3781           | S6         |
| $\alpha$ -Al <sub>2</sub> O <sub>3</sub> tube | Yes     | H <sub>2</sub> O/EtOH   | 5                        | 393   | 4.3                            | 5600           | S7         |
|                                               |         | H <sub>2</sub> O/i-PrOH |                          |       | 5.6                            | 6000           |            |
| TiO <sub>2</sub> coated<br>stainless-steel    | No      | H <sub>2</sub> O/EtOH   | 5                        | 318   | 0.86                           | 54000          | S8         |
| $\alpha$ -Al <sub>2</sub> O <sub>3</sub> tube | Yes     | H <sub>2</sub> O/EtOH   | 10                       | 348   | 5.6                            | 5000           | S9         |
| $\alpha$ -Al <sub>2</sub> O <sub>3</sub> tube | Yes     | H <sub>2</sub> O/EtOH   | 2.65                     | 333   | 2.1                            | 2140           | S10        |
| $\alpha$ -Al <sub>2</sub> O <sub>3</sub> tube | No      | H <sub>2</sub> O/i-PrOH | 5                        | 343   | 1.67                           | 4700           | S11        |
| $\alpha$ -Al <sub>2</sub> O <sub>3</sub> tube | No      | H <sub>2</sub> O/EtOH   | 10                       | 338   | 0.51                           | 10000          | S12        |
| Polymer-zeolite<br>CHF <sub>s</sub>           | No      | H <sub>2</sub> O/EtOH   | 10                       | 348   | 9.2                            | >10000         | S13        |
| $\alpha$ -Al <sub>2</sub> O <sub>3</sub> tube | Yes     | H <sub>2</sub> O/EtOH   | 10                       |       | 2.6                            | >10000         | S14        |
|                                               |         |                         |                          | 333   | 2.06                           | >10000         |            |
|                                               |         |                         |                          | 348   | 2.58                           | >10000         |            |
| $\alpha$ -Al <sub>2</sub> O <sub>3</sub> tube | No      | H <sub>2</sub> O/EtOH   | 5                        | 358   | 3.28                           | >10000         | This study |
|                                               |         |                         |                          | 373   | 4.13                           | >10000         |            |

#### References

- [S1] Kondo, M.; Komori, M.; Kita, H.; Okamoto, K. *J. Membr. Sci.* **1997**, *133*, 133.  
[S2] Jafar, J. J.; Budd, M. *Microporous Mater.* **1997**, *12*, 305.  
[S3] Huang, A.; Lin, Y.; Yang, W. *J. Membr. Sci.* **2004**, *245*, 41.

- [S4] Zah, J.; Krieg, H. M.; Breytenbach, J. C. *J. Membr. Sci.* **2006**, 284, 276.
- [S5] Huang, A.; Yang, W. *Microporous Mesoporous Mater.* **2007**, 102, 58.
- [S6] Huang, A.; Yang, W.; Liu, J. *Sep. Purif. Technol.* **2007**, 56, 158.
- [S7] Kondo, M.; Yamamura, T.; Yukitake, T.; Matsuo, Y.; Kita, H.; Okamoto, K. *Sep. Purif. Technol.* **2003**, 32, 191.
- [S8] van den Berg, A. W. C.; Gora, L.; Jansen, J. C.; Makkee, M.; Maschmeyer, Th. *J. Membr. Sci.* **2003**, 224, 29.
- [S9] Sato, K.; Nakane, T. *J. Membr. Sci.* **2007**, 301, 151.
- [S10] Shah, D.; Kissick, K.; Ghorpade, A.; Hannahb, R.; Bhattacharyya, D. *J. Membr. Sci.* **2000**, 179, 185.
- [S11] Huang, A.; Yang, W. *Sep. Purif. Technol.* **2008**, 61, 175.
- [S12] Li, Y.; Chen, H.; Liu, J.; Yang, W. *J. Membr. Sci.* **2006**, 277, 230.
- [S13] Ge, Q.; Wang, Z.; Yan, Y. *J. Am. Chem. Soc.* **2009**, 131, 17056.
- [S14] Yang, Z.; Liu, Y.; Yu, C.; Gu, X.; Xu, N. *J. Membr. Sci.* **2012**, 392-393, 18.
